# Supplementary material for: A direct foaming approach for carbon nanotube aerogels with ultra-low thermal conductivity and high mechanical stability
Source: Royal Society of Chemistry journal article supplement (doi:10.1039/d1nr02690a), 2021-01-01
Supplement: d1nr02690a1.pdf [file d1nr02690a1.pdf]

## *Supporting Information*

### **A Direct Foaming Approach for Carbon Nanotube Aerogels with ultra Low Thermal Conductivity and High Mechanical Stability**

Yu Wen Chen, Hang Zhan, Jian Nong Wang\*

*School of Mechanical and Power Engineering, East China University of Science and  
Technology, 130 Meilong Road, Shanghai 200237, China*

\* *Corresponding author. Tel: 86-21-64252360.*

*E-mail: jnwang@ecust.edu.cn (Jian Nong Wang)*

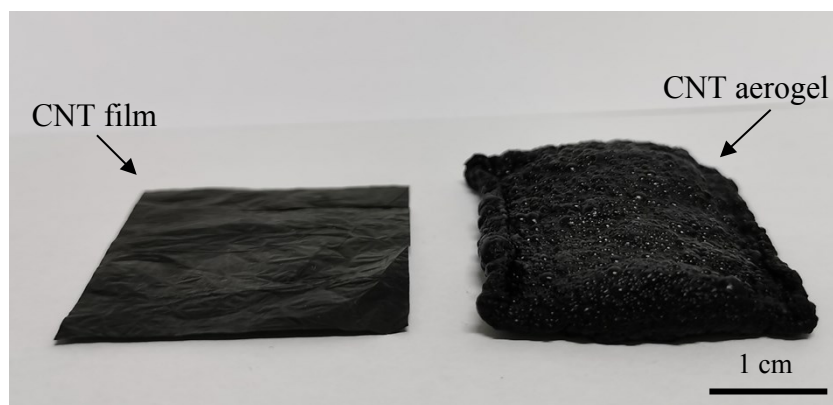

**Figure S1.** Optical images of a CNT film and aerogel

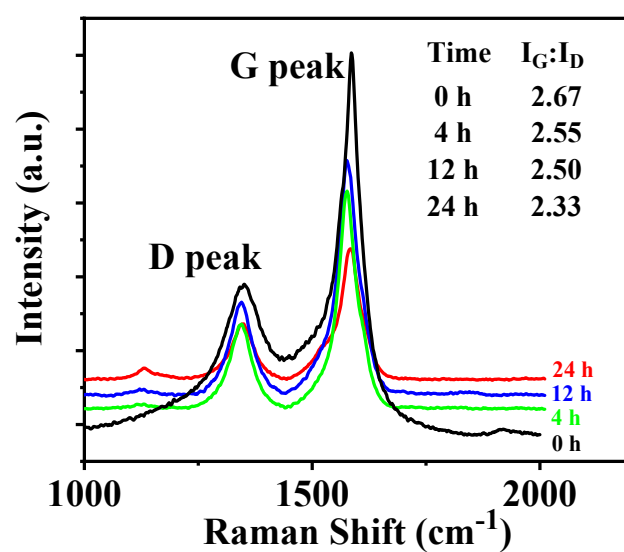

**Figure S2.** Raman spectra of the CNT samples formed at different soaking periods of time of 0, 4, 12, 24 h.

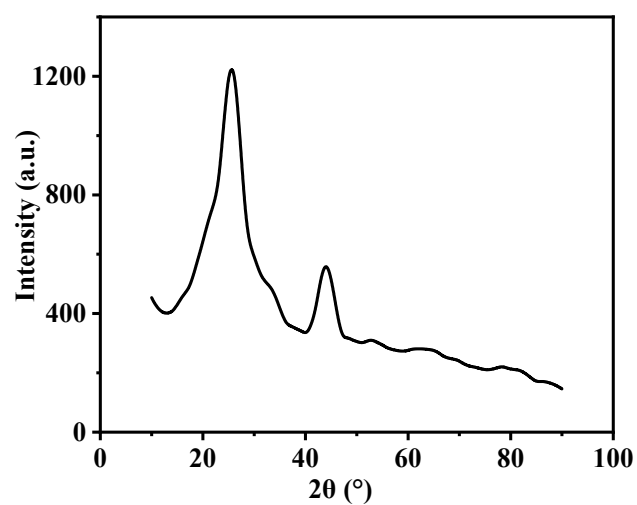

**Figure S3.** XRD spectrum of a CNT aerogel

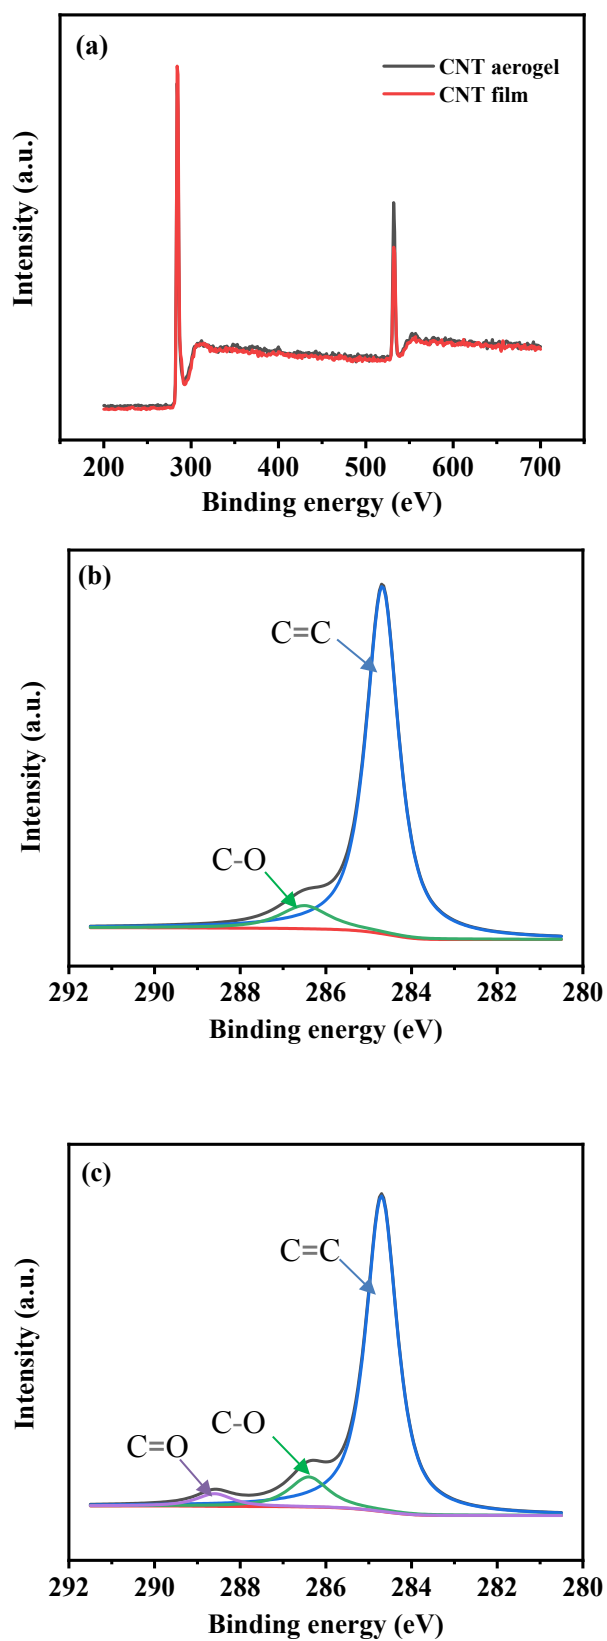

**Figure S4.** XPS spectra (a) and deconvolution of the C1s XPS for CNT film (b) and aerogel (c)

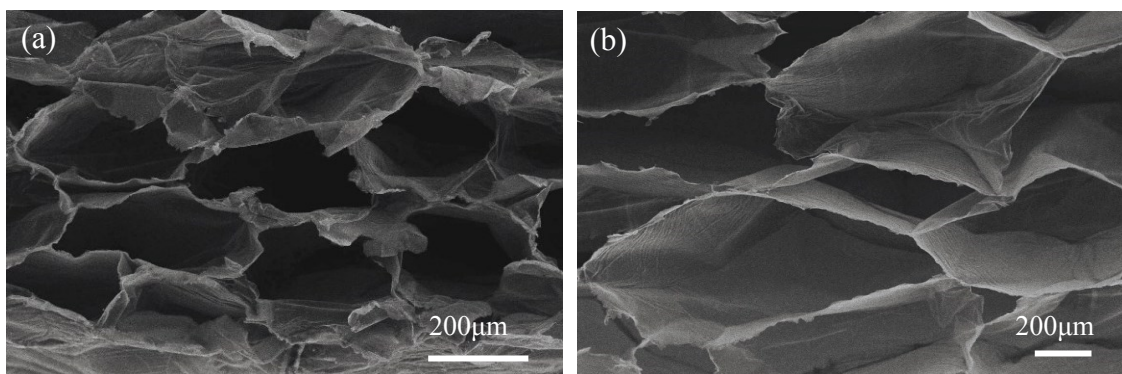

**Figure S5.** SEM images of the cross sections of the CNT samples formed at different soaking periods of time of 1 and 12 h

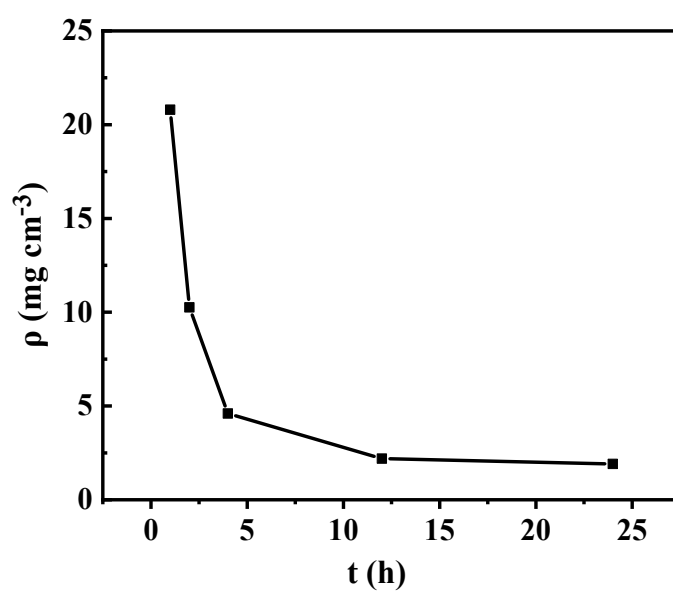

**Figure S6.** Variation of density  $\rho$  for CNT aerogel with time  $t$  used for direct soaking

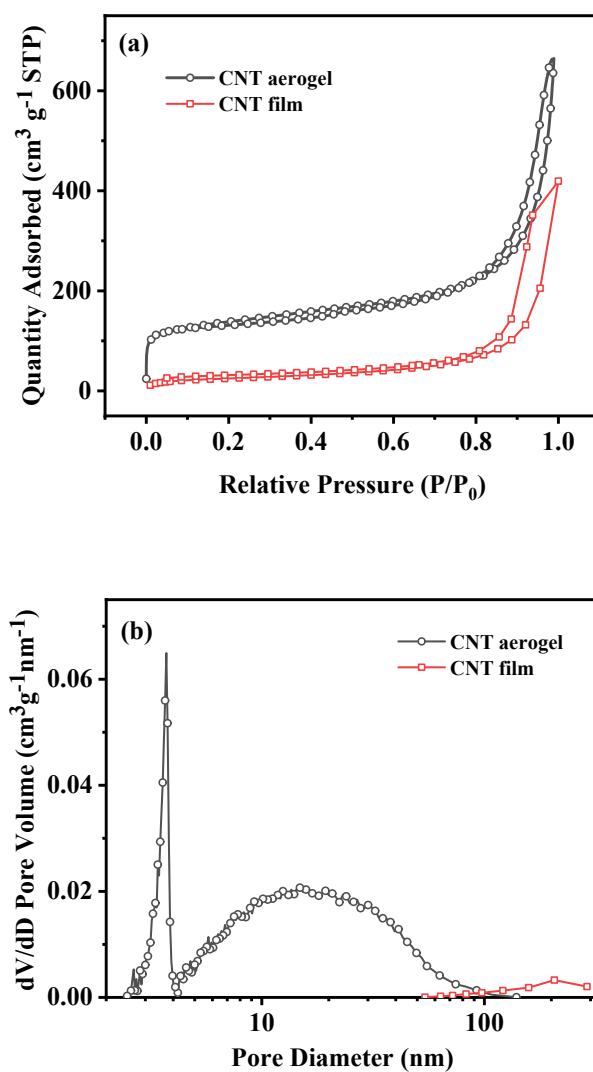

**Figure S7.** Pore size analysis. (a) Nitrogen sorption isotherms for a CNT film and aerogel; (b) Pore size distributions for a CNT film and aerogel

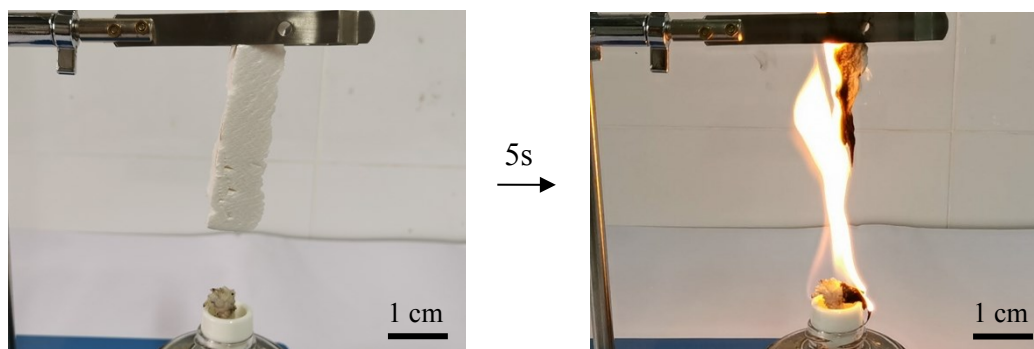

**Figure S8.** Burning test of a commercial XPS thermal shield in the flame of an alcohol lamp

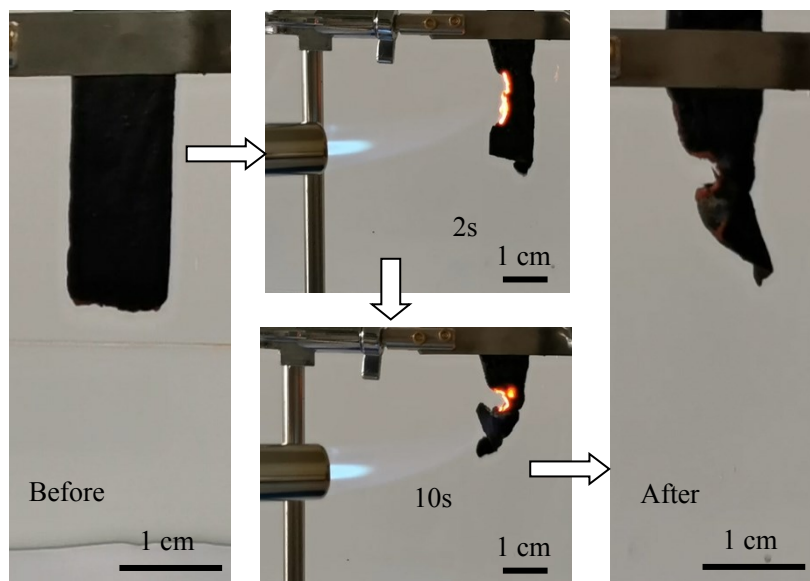

**Figure S9.** Burning test of a CNT aerogel in the flame of a butane blowtorch
